# Supplementary figures and images for: Identification and quantitative detection of two pathogenic bacteria based on a terahertz metasensor
Source: Royal Society of Chemistry journal article supplement (doi:10.1039/d2nr05038b), 2022-11-29

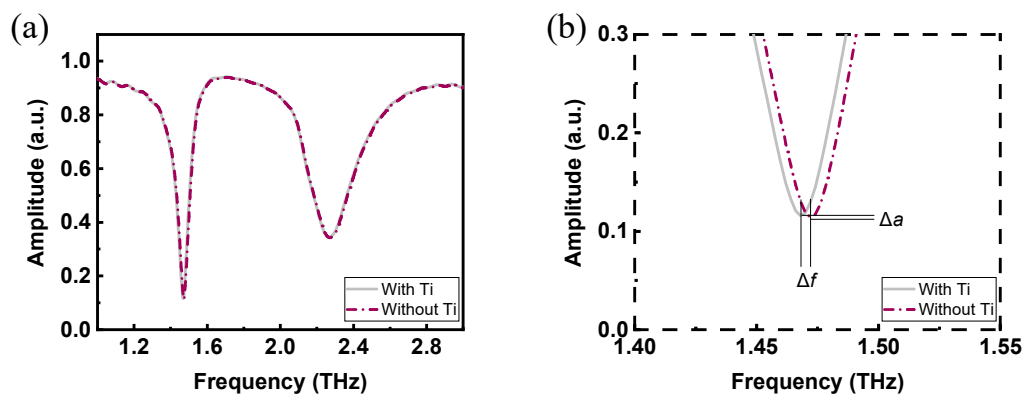

Fig. S1

Supplement: d2nr05038b2.pdf [file d2nr05038b2.pdf]

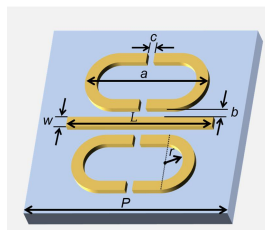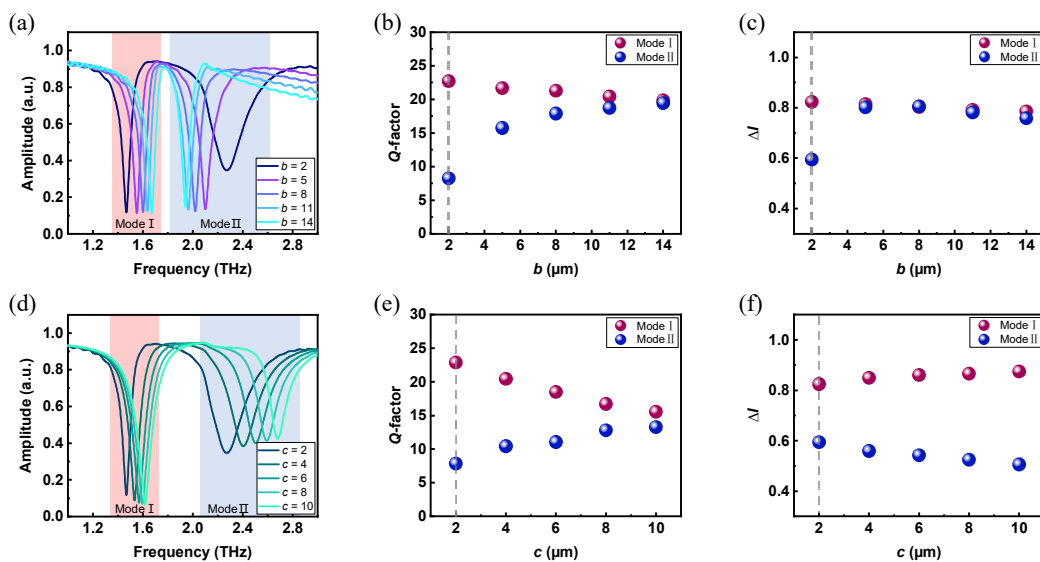

Fig. S2

Supplement: d2nr05038b3.pdf [file d2nr05038b3.pdf]

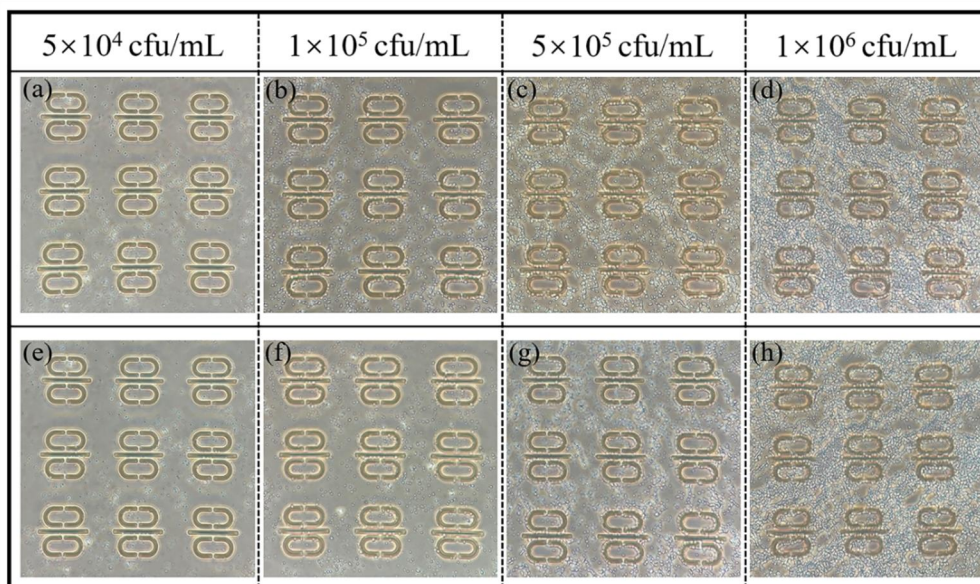

Fig. S3

Supplement: d2nr05038b4.pdf [file d2nr05038b4.pdf]

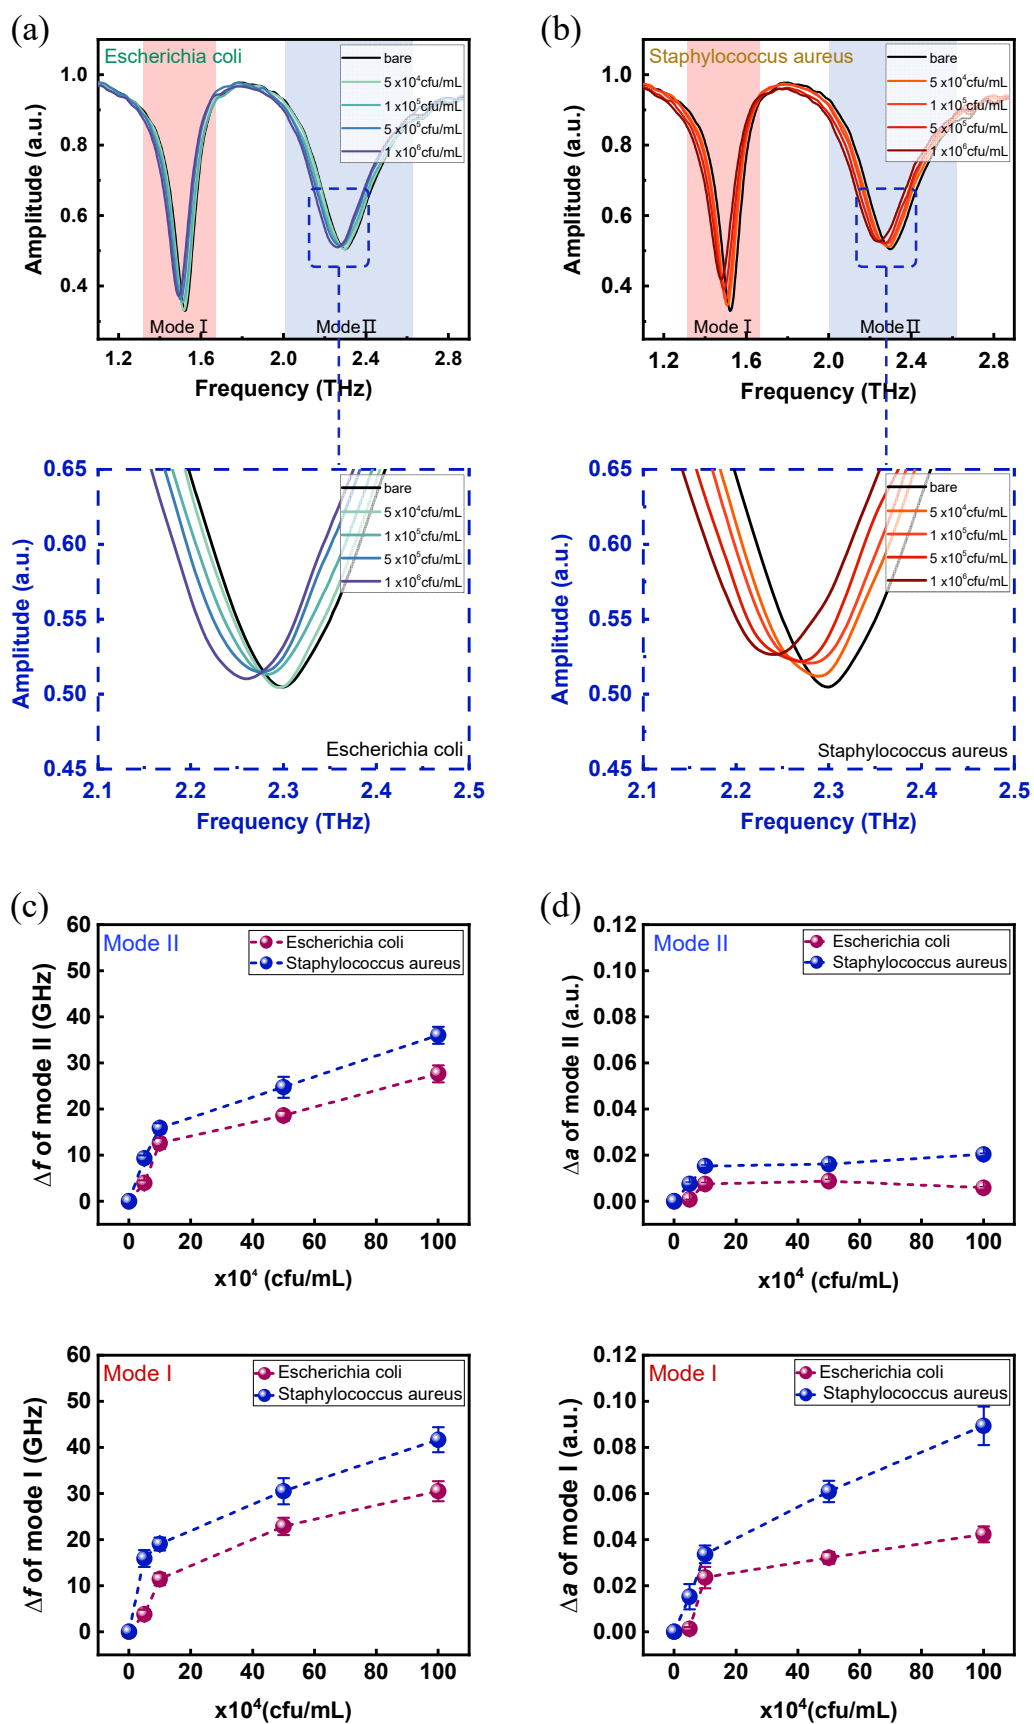

Fig. S4

Supplement: d2nr05038b5.pdf [file d2nr05038b5.pdf]
